# Supplementary material for: Coumarin-pyridone conjugate as a fluorescent tag for LFPs visualization and electrochemical sensor for nitrite detection
Source: Royal Society of Chemistry journal article supplement (doi:10.1039/d1nj04751e), 2022-01-01
Supplement: d1nj04751e1.pdf [file d1nj04751e1.pdf]

**Coumarin-Pyridone conjugate as a Fluorescent tag for LFPs visualization  
and Electrochemical Sensor for Nitrite**

**Manjunatha B<sup>1</sup>, Yadav D. Bodke<sup>1\*</sup>, Mounesh<sup>2</sup>, Nagaraja O<sup>1</sup>, Navaneethgowda P.V.<sup>1</sup>**

*<sup>1</sup>Department of P.G. Studies and Research in Chemistry, Jnana Sahyadri, Kuvempu University  
Shankaraghatta- 577451, Shivamogga, Karnataka, India.*

*<sup>2</sup>Department of P.G. Studies and Research in Chemistry, Vijayanagara Sri Krishnadevaraya  
University, Ballari-583105, Karnataka, India.*

*\*Corresponding author: E-mail: [ydbodke@gmail.com](mailto:ydbodke@gmail.com)*

**Fig.S1:** IR spectrum of CPC

**Fig.S2:** <sup>1</sup>H NMR spectrum of CPC

**Fig.S3:** <sup>13</sup>C NMR spectrum of CPC

**Fig.S4:** HRMS spectrum of CPC

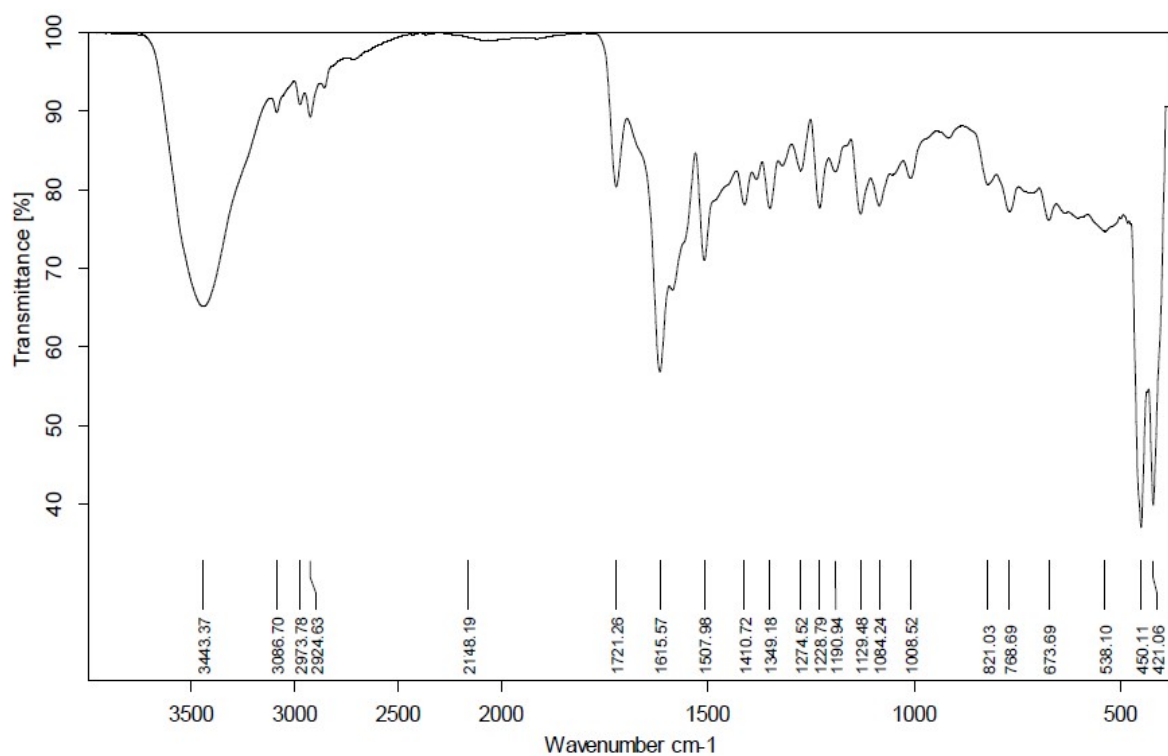

Figure S1: IR spectrum of CPC

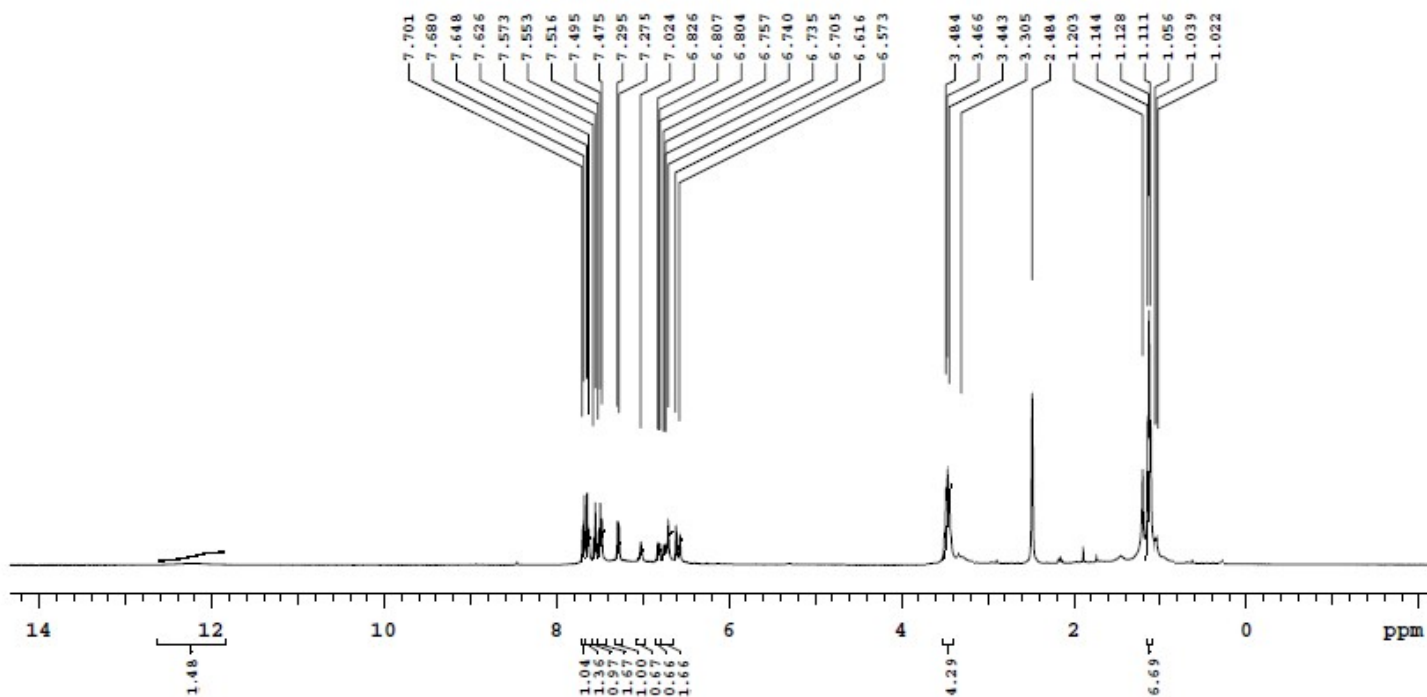

|                                                                                                                                        |                                |                                                                                             |                                                                                                                        |
|----------------------------------------------------------------------------------------------------------------------------------------|--------------------------------|---------------------------------------------------------------------------------------------|------------------------------------------------------------------------------------------------------------------------|
| <p>FULSE SEQUENCE<br/>Relax. delay 1.000 sec<br/>Pulse 45.0 degrees<br/>Acq. time 3.408 sec<br/>Width 9615.4 Hz<br/>16 repetitions</p> | <p>OBSERVE H1, 399.8231903</p> | <p>DATA PROCESSING<br/>Line broadening 1.0 Hz<br/>FT size 65536<br/>Total time 1 minute</p> | <p>F1-1H<br/>Solvent: dmsc<br/>Ambient temperature<br/>Operator: vnmr1<br/>File: F1-1H<br/>VNMRS-400 "Agilent-NMR"</p> |
|----------------------------------------------------------------------------------------------------------------------------------------|--------------------------------|---------------------------------------------------------------------------------------------|------------------------------------------------------------------------------------------------------------------------|

Figure S2: <sup>1</sup>H NMR spectrum of CPC

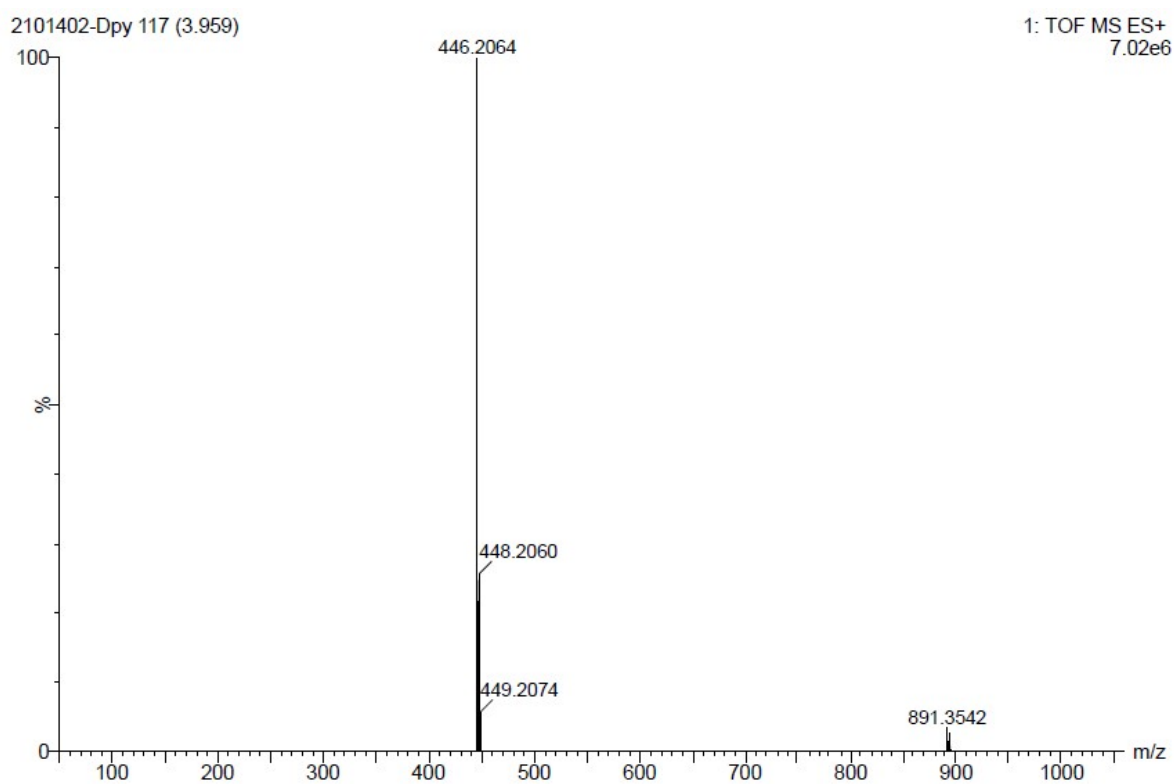

**Figure S3:**HRMS spectrum of CPC

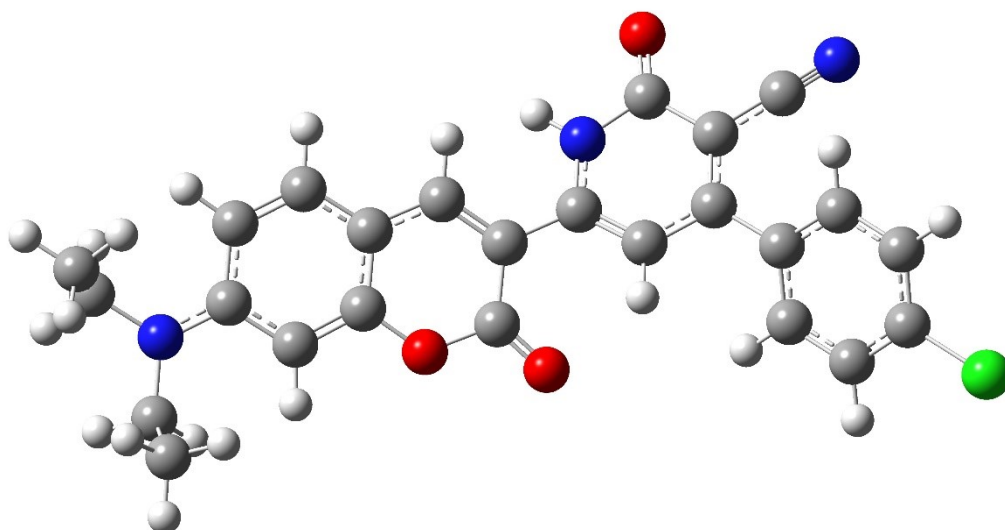

**Figure S4:** Optimized structure of CPC
